# Supplementary material
Source: ML conference proceedings conference paper supplement (https://openreview.net/forum?id=UCQPWBOWb6)
Supplement: supplementary_material [file attachment]

## A Artifact Appendix

### A.1 Abstract

This artifact includes the Radius for accelerating the pre-training of the Foundation Models. The example scripts for pre-training GPT-355M and GPT-2.0B model with OpenWebText dataset using dense *allreduce* and Radius are provided. Compared to the dense *allreduce* method, Radius with  $d = 0.4$  and  $T = 200$  achieved 20% speedup on pre-training GPT-2.0B model using 64 NVIDIA A100-80GB GPUs of Perlmutter supercomputer.

### A.2 Artifact check-list (meta-information)

- **Algorithm:** Radius
- **Program:** Python
- **Model:** GPT-355M and GPT-2.0B
- **Data set:** OpenWebText
- **Run-time environment:**
- **Hardware:** A100-80GB GPUs
- **How much time is needed to complete experiments (approximately)?:** Depending on the status of Perlmutter, the whole experiment should take around two months, including the pre-training of GPT-355M and GPT-2.0B models and the corresponding evaluation on downstream tasks.
- **Publicly available?:** Yes
- **Workflow automation framework used?:** SLURM

### A.3 Description

**A.3.1 How to access.** The code and instructions can be accessed through our github repository: link.

**A.3.2 Hardware dependencies.** Our experiment was carried out using 64 A100-80GB GPUs on Perlmutter supercomputer, where each compute node has 4 A100-80GB GPUs connected by NVLink3, providing an intra-node communication bandwidth of 600 GB/s, and the compute nodes are connected through HPE Slingshot 11, providing an aggregated internode communication bandwidth of 100 GB/s.

Other supercomputers or clusters with A100-80GB GPUs and the same intra- and inter-node communication bandwidth should observe similar speedups as reported in the paper.

**A.3.3 Software dependencies.** Some important Python packages: Apex, amp\_C, and PyTorch.

**A.3.4 Data sets.** OpenWebText

**A.3.5 Models.** GPT-355M and GPT-2.0B from scratch. Please find the detailed model architecture in Table 1.

**Table 1.** Model architecture

| MODEL    | $n_{\text{LAYERS}}$ | $n_{\text{HEADS}}$ | $d_{\text{MODEL}}$ | $d_{\text{HEAD}}$ |
|----------|---------------------|--------------------|--------------------|-------------------|
| GPT-355M | 24                  | 16                 | 1024               | 64                |
| GPT-2.0B | 24                  | 32                 | 2560               | 80                |

### A.4 Installation

git clone <https://github.com/mz687/radius>

### A.5 Experiment workflow

Please check our GitHub repository for the complete workflow and instructions.

### A.6 Evaluation and expected results

Table 2, Figure 1, Figure 2 should be obtained after the complete workflow.

**Table 2.** Train, validation perplexity, wall-clock time, and overall training speedup.

|          |                        | BASELINE     | RADIUS             |                    |                    |                    |                    |
|----------|------------------------|--------------|--------------------|--------------------|--------------------|--------------------|--------------------|
|          |                        |              | $d = 0.9, T = 200$ | $d = 0.5, T = 200$ | $d = 0.4, T = 200$ | $d = 0.4, T = 400$ | $d = 0.1, T = 200$ |
| GPT-355M | TRAIN PPL              | <b>14.64</b> | —                  | 14.65              | —                  | —                  | —                  |
|          | VAL. PPL               | 14.32        | —                  | <b>14.31</b>       | —                  | —                  | —                  |
| GPT-2.0B | TRAIN PPL              | <b>10.86</b> | 10.87              | 10.89              | 10.94              | 10.94              | <u>11.85</u>       |
|          | VAL. PPL               | 11.42        | <b>11.37</b>       | 11.39              | 11.41              | 11.46              | <u>11.98</u>       |
|          | WALL-CLOCK TIME (DAYS) | 6.44         | 6.82               | 5.73               | 5.43               | 5.41               | 4.78               |
|          | SPEEDUP                | —            | -5.55%             | 12.40%             | 18.55%             | 19.03%             | 34.76%             |

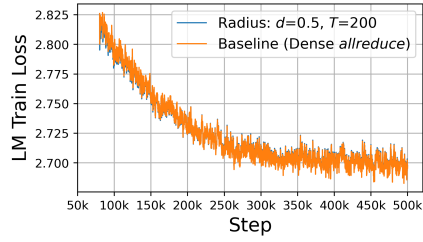

(a) Train loss curve

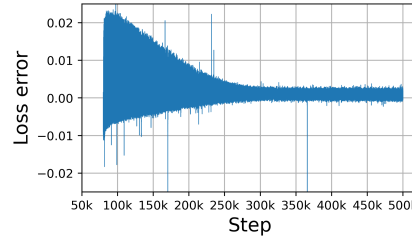

(b) Train loss error (baseline - Radius)

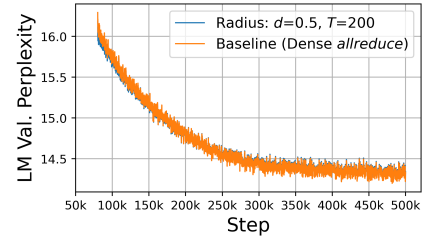

(c) Validation PPL curve

**Figure 1.** Curves of pre-training GPT-355M with baseline (dense *allreduce*) and Radius

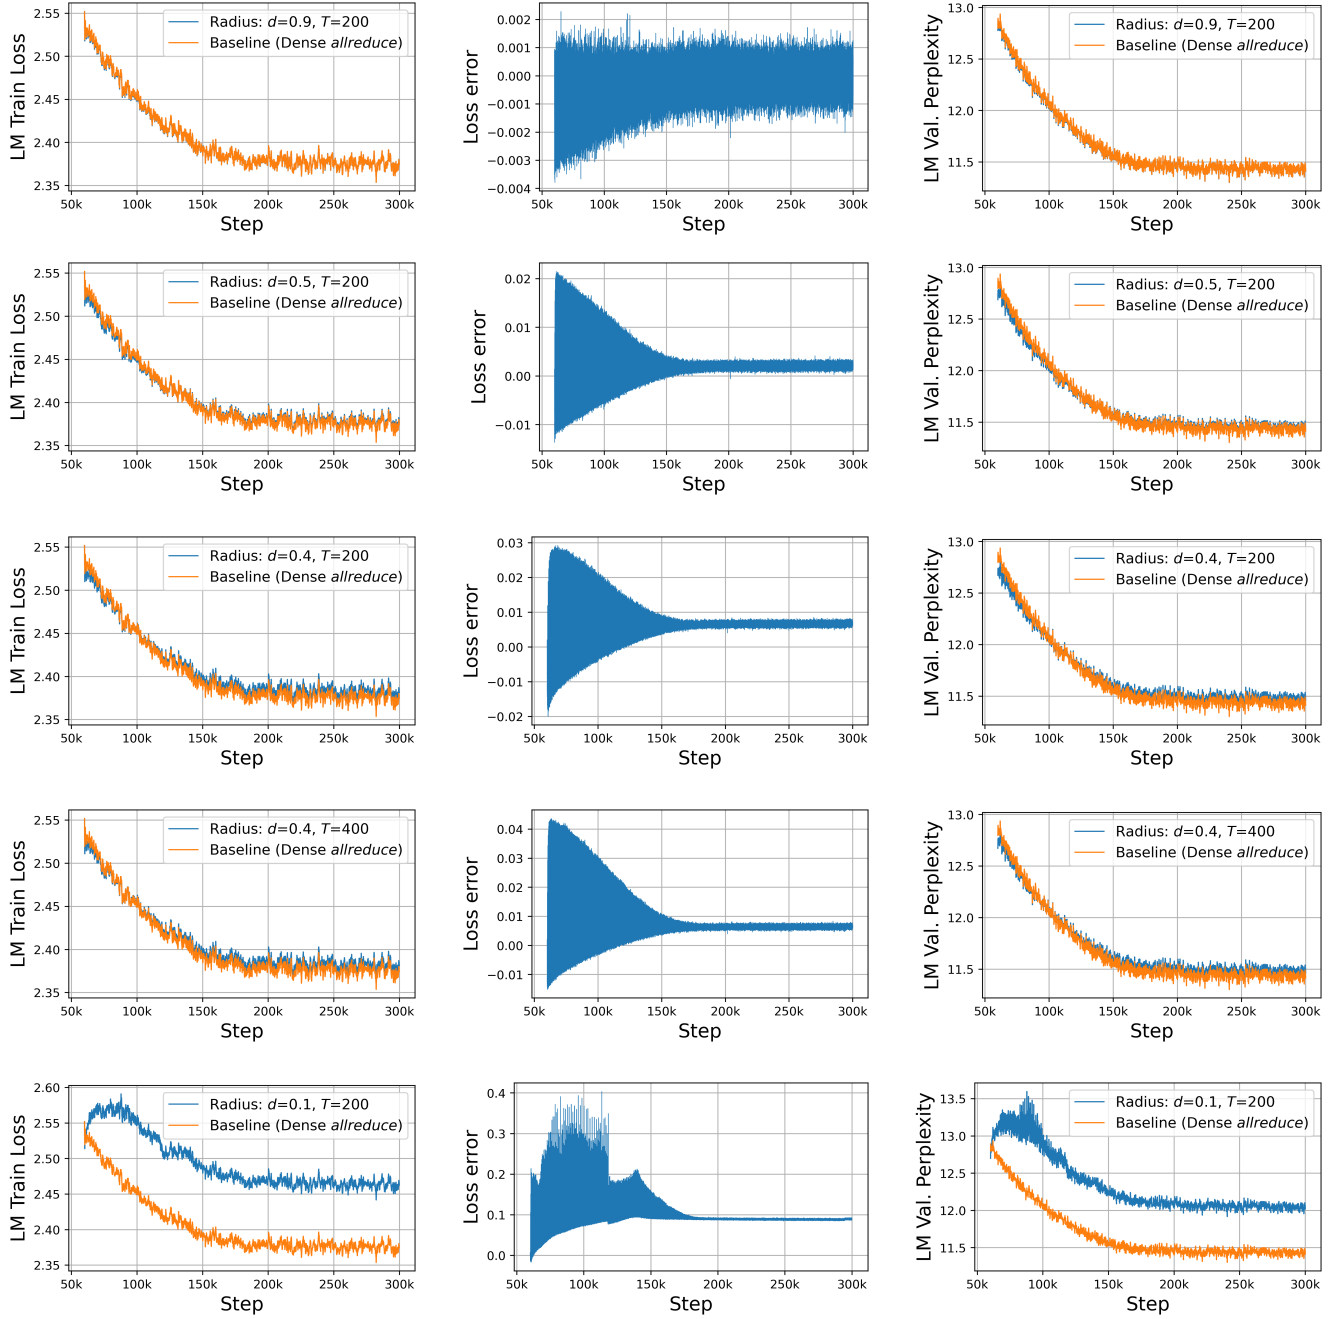

(a) Train loss curves

(b) Train loss error curves

(c) Validation PPL curves

**Figure 2.** Curves of pre-training GPT-2.0B with baseline (dense *allreduce*) and Radius
